# Supplementary material for: Species Diversity, Nitrogen Fixation, and Nutrient Solubilization Activities of Endophytic Bacteria in Pea Embryos
Source: MDPI journal article supplement (doi:10.3390/app14020788), 2024-01-17
Supplement: s1 [file s1]

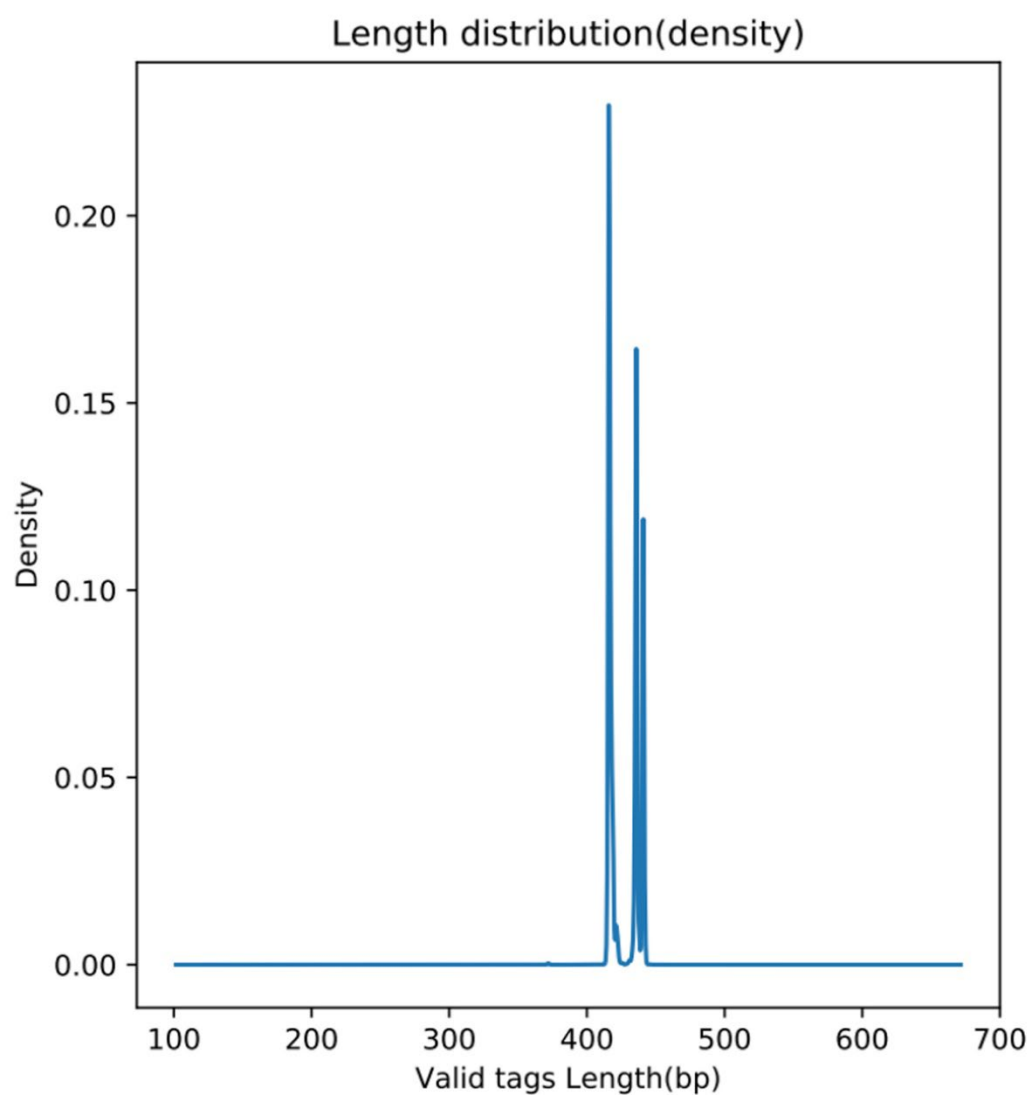

**Figure S1.** Length-density distribution diagram of effective sequences from culturable endophytic bacteria in pea embryos.

**Table S1.** Colony morphology of the 27 putative nitrogen-fixing bacterial (NFB) strains identified from pea embryos.

| Strain No. | Size   | Shape | Edge   | Texture | Color        | Raised/Flat | Transparency |
|------------|--------|-------|--------|---------|--------------|-------------|--------------|
| S18P01-1   | Small  | Round | Smooth | Dry     | White        | Flat        | Opaque       |
| S18P01-2   | Medium | Round | Smooth | Wet     | None         | Raised      | Transparent  |
| S18P02-1   | Small  | Round | Smooth | Wet     | White        | Raised      | Translucent  |
| S18P02-2   | Medium | Round | Smooth | Wet     | Yellowish    | Raised      | Transparent  |
| S18P02-3   | Large  | Round | Smooth | Wet     | Milky        | Raised      | Translucent  |
| S18P03-1   | Medium | Round | Smooth | Wet     | Milky        | Raised      | Translucent  |
| S18P03-2   | Medium | Round | Smooth | Wet     | Light yellow | Raised      | Translucent  |
| S18P04-1   | Medium | Round | Smooth | Wet     | Light yellow | Raised      | Transparent  |
| S18P04-2   | Large  | Round | Smooth | Wet     | Yellow       | Raised      | Translucent  |
| S18P04-3   | Medium | Round | Smooth | Wet     | Light yellow | Raised      | Translucent  |
| S18P05-1   | Small  | Round | Smooth | Dry     | White        | Raised      | Opaque       |
| S18P05-2   | Small  | Round | Smooth | Wet     | None         | Raised      | Transparent  |
| S18P06-1   | Small  | Round | Smooth | Wet     | Light yellow | Raised      | Translucent  |
| S18P06-2   | Small  | Round | Smooth | Wet     | Light yellow | Raised      | Opaque       |
| S18P06-3   | Small  | Round | Smooth | Wet     | Light yellow | Raised      | Transparent  |
| S18P07-1   | Large  | Round | Smooth | Wet     | Light yellow | Raised      | Translucent  |
| S18P07-2   | Small  | Round | Smooth | Wet     | White        | Raised      | Translucent  |
| S18P07-3   | Medium | Round | Smooth | Wet     | Light yellow | Raised      | Translucent  |
| S18P08-1   | Medium | Round | Smooth | Wet     | Light yellow | Raised      | Opaque       |
| S18P08-2   | Medium | Round | Smooth | Wet     | Milky        | Raised      | Opaque       |
| S18P08-3   | Small  | Round | Smooth | Wet     | White        | Raised      | Translucent  |
| S18P09     | Small  | Round | Smooth | Wet     | Milky        | Raised      | Translucent  |
| S18P10     | Medium | Round | Smooth | Wet     | Light yellow | Raised      | Transparent  |
| S18P11-1   | Medium | Round | Smooth | Wet     | Milky        | Raised      | Opaque       |
| S18P11-2   | Medium | Round | Smooth | Wet     | Light yellow | Raised      | Translucent  |
| S18P12-1   | Medium | Round | Smooth | Wet     | Milky        | Raised      | Translucent  |
| S18P12-2   | Medium | Round | Smooth | Wet     | Milky        | Raised      | Translucent  |

**Table S2.** Summary of effective DNA sequencing reads from endophytic bacteria in pea embryos and derived operational taxonomic units (OTUs).

| Sample No. | Effective reads | OTUs | Sample No. | Effective reads | OTUs |
|------------|-----------------|------|------------|-----------------|------|
| S18P01.1   | 25236           | 690  | S18P11.1   | 34886           | 301  |
| S18P01.2   | 36987           | 362  | S18P11.2   | 36418           | 283  |
| S18P02.1   | 33292           | 271  | S18P12.1   | 31574           | 311  |
| S18P02.2   | 33984           | 334  | S18P12.2   | 33842           | 310  |
| S18P03.1   | 36059           | 360  | S18P13.1   | 31849           | 406  |
| S18P03.2   | 33734           | 379  | S18P13.2   | 35615           | 418  |
| S18P04.1   | 33225           | 433  | S18P14.1   | 36546           | 514  |
| S18P04.2   | 34204           | 483  | S18P14.2   | 33946           | 488  |
| S18P05.1   | 32964           | 332  | S18P15.1   | 35856           | 399  |
| S18P05.2   | 35107           | 341  | S18P15.2   | 36085           | 423  |
| S18P06.1   | 31884           | 358  | S18P16.1   | 32335           | 338  |
| S18P06.2   | 23449           | 323  | S18P16.2   | 34855           | 446  |
| S18P07.1   | 33543           | 460  | S18P17.1   | 36774           | 374  |
| S18P07.2   | 33656           | 604  | S18P17.2   | 37104           | 354  |
| S18P08.1   | 34236           | 367  | S18P18.1   | 35905           | 604  |
| S18P08.2   | 36669           | 335  | S18P18.2   | 27585           | 452  |
| S18P09.1   | 35348           | 453  | S18P19.1   | 35176           | 297  |
| S18P09.2   | 35535           | 329  | S18P19.2   | 34399           | 395  |
| S18P10.1   | 35810           | 343  | S18P20.1   | 34660           | 342  |
| S18P10.2   | 34477           | 278  | S18P20.2   | 35954           | 387  |

**Table S3.** Sequencing depths and diversity indexes of endophytic bacterial samples in pea embryos.

| Sample No. | Sequencing depth | Diversity index |         |         |
|------------|------------------|-----------------|---------|---------|
|            |                  | Chao1           | Shannon | Simpson |
| S18P02.1   | 0.9993           | 239.39          | 6.91    | 0.98    |
| S18P02.2   | 0.9990           | 300.41          | 6.45    | 0.94    |
| S18P03.1   | 0.9988           | 300.93          | 7.13    | 0.98    |
| S18P03.2   | 0.9992           | 302.72          | 7.14    | 0.98    |
| S18P04.1   | 0.9987           | 346.90          | 7.31    | 0.99    |
| S18P04.2   | 0.9985           | 394.01          | 7.42    | 0.99    |
| S18P05.1   | 0.9991           | 284.61          | 7.21    | 0.99    |
| S18P05.2   | 0.9983           | 312.30          | 6.62    | 0.96    |
| S18P06.1   | 0.9986           | 305.09          | 7.01    | 0.98    |
| S18P06.2   | 0.9992           | 268.86          | 6.68    | 0.97    |
| S18P08.1   | 0.9990           | 305.40          | 7.05    | 0.98    |
| S18P08.2   | 0.9990           | 301.90          | 6.49    | 0.95    |
| S18P10.1   | 0.9993           | 288.42          | 5.89    | 0.88    |
| S18P10.2   | 0.9991           | 239.01          | 5.61    | 0.89    |
| S18P11.1   | 0.9989           | 262.95          | 6.34    | 0.94    |
| S18P11.2   | 0.9982           | 226.26          | 1.20    | 0.20    |
| S18P12.1   | 0.9989           | 276.76          | 7.20    | 0.99    |
| S18P12.2   | 0.9991           | 245.85          | 7.19    | 0.99    |

**Table S4.** The long 16S rDNA sequences of four selected nitrogen-fixing bacterial (NFB) strains.

> S18P02-2 (GenBank Accession No. PP082614)

AGCTTGCTCTCGGGTGACGAGTGGCGGACGGGTGAGTAATGTCTGGGAAACTGCCCGATGGAGGGGGATAA  
CTACTGGAACGGTAGCTAATACCGCATAACGTCGCAAGACCAAAGAGGGGGACCTTCGGGCCTCTTGCCA  
TCGGATGTGCCAGATGGGATTAGCTTGTAGGTGAGGTAACGGCTCACCTAGGCGACGATCCCTAGCTGGTC  
TGAGAGGATGACCAGCCACACTGGAAGTGAAGACACGGTCCAGACTCCTACGGGAGGCAGCAGTGGGGAAT  
ATTGCACAATGGGCGCAAGCCTGATGCAGCCATGCCGCGTGTATGAAGAAGGCCTTCGGGTTGTAAAGTACT  
TTCAGCGGGGAGGAAGGGAGTGAGGTTAATAACCTTATTCATTGACGTTACCCGCAGAAGAAGCACCGGCT  
AACTCCGTGCCAGCAGCCGCGGTAATACGGAGGGTGCAAGCGTTAATCGGAATTACTGGGCGTAAAGCGCA  
CGCAGGCGGTCTGTCAAGTCGGATGTGAAATCCCCGGGCTCAACCTGGGAACTGCATTGAAACTGGCAGG  
CTGGAGTCTTGTAGAGGGGGGTAGAATTCCAGGTGTAGCGGTGAAATGCGTAGAGATCTGGAGGAATACCG  
GTGGCGAAGGCGGCCCCCTGGACAAAGACTGACGCTCAGGTGCGAAAGCGTGGGGAGCAAAACAGGATTAG  
ATACCTTGGTAGTCCACGCTGTAAACGATGTGCACTTGGAGGTTGTTCCCTTGAGGAGTGGCTTCCGGAGCTA  
ACGCGTTAAGTCGACCGCCTGGGGAGTACGGCCGCAAGGTTAAAACTCAAATGAATTGACGGGGGCCCCGCA  
CAAGCGGTGGAGCATGTGGTTTAATTCGATGCAACGCGAAGAACCTTACCTACTCTTGACATCCAGAGAACT  
TAGCAGAGATGCTTTGGTGCTTCGGAACTGTGAGACAGGTGCTGCATGGCTGTCGTACGCTCGTGTGTGA  
AATGTTGGGTAAAGTCCCGCAACGAGCGCAACCCTTATCCTTTGTTGCCAGCGATTTCGGTCGGGAACTCAA  
GGAGACTGCCAGTGATAAACTGGAGGAAGGTGGGGATGACGTCAAGTCATCATGGCCCTTACGAGTAGGGC  
TACACACGTGCTACAATGGCATATACAAAGAGAAGCGACCTCGCGAGAGCAAGCGGACCTCATAAAGTATG  
TCGTAGTCCGGATTGGAGTCTGCAACTCGACTCCATGAAGTCGGAATCGCTAGTAATCGTGATCAGAATGC  
CACGGTGAATACGTTCCCGGGCCTTGACACACCGCCCGTCACACCATGGGAGTGGGTTGCAAAAGAAGTA  
GGTAGCTT

> S18P08-2 (GenBank Accession No. PP082615)

GGGGGGGCCTAACACATGCAGTCGAGCGGTAACACAGGGAGCTTGCTCCCGGGTGACGAGCGGCGGACGG  
GTGAGTAATGTCTGGGAAACTGCCTGATGGAGGGGGATAACTACTGGAAACGGTAGCTAATACCGCATAAC  
GTCGCAAGACCAAAGAGGGGGACCTTCGGGCCTCTTGCCATCAGATGTGCCAGATGGGATTAGCTAGTAG  
GTGGGGTAACGGCTCACCTAGGCGACGATCCCTAGCTGGTCTGAGAGGATGACCAGCCACACTGGAAGTGA  
GACACGGTCCAGACTCCTACGGGAGGCAGCAGTGGGGAATATTGCACAATGGGCGCAAGCCTGATGCAGCC  
ATGCCGCGTGTATGAAGAAGGCCTTCGGGTTGTAAAGTACTTTTACGCGGGGAGGAAGGTGTTGAGGTTAATA  
ACCTCATCAATTGACGTTACCCGCAGAAAAAACACCGGCTAACTCCGTGCCAGCAGCCGCGGTAATACGGA  
GGGTGCAAGCGTTAATCGGAATTACTGGGCGTAAAGCGCACGCAGGCGGTCTGTCAAGTCGGATGTGAAAT  
CCCCGGGCTCAACCTGGGAACTGCATTGCAAACTGGCAGGCTAGAGTCTTGTAGAGGGGGGTAGAATTCCA  
GGTGTAGCGGTGAAATGCGTAGAGATCTGGAGGAATACCGGTGGCGAAGGCGGCCCCCTGGACAAAGACT  
GACGCTCAGGTGCGAAAGCGTGGGGAGCAAAACAGGATTAGATACCCTGGTAGTCCACGCCGTAAACGATGT  
CGACTTGGAGGTTGTGCCCTTGAGGCGTGGCTTCCGGAGCTAACGCGTTAAGTCGACCGCCTGGGGAGTACG  
GCCGCAAGGTTAAAACTCAAATGAATTGACGGGGGCCCCGACAAGCGGTGGAGCATGTGGTTTAATTCGAT  
GCAACGCGAAGAACCTTACCTACTCTTGACATCCAGAGAACTTTCCAGAGATGGATTGGTGCCTTCGGGAAC  
TCTGAGACAGGTGCTGCATGGCTGTCGTACGCTCGTGTGTGAAATGTTGGGTAAAGTCCCGCAACGAGCGC  
AACCCTTATCCTTTGTTGCCAGCGGTCCGGCCGGGAACTCAAAGGAGACTGCCAGTGATAAACTGGAGGAA  
GGTGGGGATGACGTCAAGTCATCATGGCCCTTACGAGTAGGGCTACACACGTGCTACAATGGCGCATACAA  
AGAGAAGCGACCTCGCGAGAGCAAGCGGACCTCATAAAGTGCCTCGTAGTCCGGATTGGAGTCTGCAACTC  
GACTCCATGAAGTCGGAATCGCTAGTAATCGTAGATCAGAATGCTACGGTGAATACGTTCCCGGGCCTTGTA  
CACACCGCCCGTCACACCATGGGAGTGGGTTGCAAAAGAAGTAGGTAGCTTAACCTTCGGGAGGGCGCTTA  
CCCACCA

> S18P08-3 (GenBank Accession No. PP082616)

TACCCGCAGAAGAAGCACCGGGCTAACTCCGGTGCCAGCAGCCGCGTAATACGGAGGGTGCAAGCGTTA  
ATCGGAATTACTGGGCGTAAAGCGCACGCAGGCGGTCTGTCAAGTCGGATGTGAAATCCCCGGGCTCAACT  
GGGAACTGCATTGCGAACTGGCAGGCTAGAGTCTTGTAGAGGGGGGTAGAATTCCAGGTGTAGCGGTGAAA  
TGCGTAGAGATCTGGAGGAATACCGGTGGCGAAGGCGGCCCCCTGGACAAAGACTGACGCTCAGGTGCGA  
AAGCGTGGGGAGCAAACAGGATTAGATACCCTGGTAGTCCACGCCGTAAACGATGTGCACTTGGAGGTTGT  
TCCCTTGAGGAGTGGCTTCCGGAGCTAACGCGTTAAGTCGACCGCCTGGGGAGTACGGCCGCAAGGTTAAA  
ACTCAAATGAATTGACGGGGGGCCCGCACAAAGCGGTGGAGCATGTGGTTTAATTCGATGCAACGCGAAGAAC  
CTTACCTACTCTTGACATCCAGAGAACTTTCCAGAGATGGATTGGTGCCTTCGGGAACTCTGAGACAGGTGCT  
GCATGGCTGTCGTGAGCTCGTGTGTGAAATGTTGGGTTAAGTCCCGCAACGAGCGCAACCCCTATCCTTTGT  
TGCCAGCGGTTAGGCCGGGAACCTCAAAGGAGACTGCCAGTGATAAACTGGAGGAAGGTGGGGATGACGTC  
AAGTCATCATGGCCCTTACGAGTAGGGCTACACACGTGCTACAATGGCATATACAAAGAGAAGCGACCTCG  
CGAGAGCAAGCGGACCTCATAAAGTATGTCGTAGTCCGATTGGAGTCTGCAACTCGACTCCATGAAGTCG  
GAATCGCTAGTAATCGTAGATCAGAATGCTACGGTGAATACGTTCCCGGGCCTTGTACACACCGCCCGTCAC  
ACCA

> S18P12-1 (GenBank Accession No. PP082617)

CACAGGGAGCTTGCTCCTGGGTGACGAGCGGCGGACGGGTGAGTAATGTCTGGGAACTGCCTGATGGAGG  
GGGATAACTACTGGAAACGGTAGCTAATACCGCATAACGTCGCAAGACCAAAGAGGGGGACCTTCGGGCCT  
CTTGCCATCAGATGTGCCAGATGGGATTAGCTAGTAGGTGGGGTAACGGCTCACCTAGGCGACGATCCCTA  
GCTGGTCTGAGAGGATGACCAGCCACACTGGAAGTGGAGACACGGTCCAGACTCCTACGGGAGGCAGCAGTG  
GGGAATATTGCACAATGGGCGCAAGCCTGATGCAGCCATGCCGCGTGTATGAAGAAGGCCTTCGGGTTGTA  
AAGTACTTTCAGCGGGGAGGAAGGTGTTGAGGTTAATAACCTCAGCAATTGACGTTACCCGCAGAAGAAGC  
ACCGGCTAACTCCGTGCCAGCAGCCGCGGTAATACGGAGGGTGCAAGCGTTAATCGGAATTACTGGGCGTA  
AAGCGCACGCAGGCGGTCTGTCAAGTCGGATGTGAAATCCCCGGGCTCAACCTGGGAACTGCATTGAAAC  
TGGCAGGCTAGAGTCTTGTAGAGGGGGGTAGAATTCCAGGTGTAGCGGTGAAATGCGTAGAGATCTGGAGG  
AATACCGGTGGCGAAGGCGGCCCCCTGGACAAAGACTGACGCTCAGGTGCGAAAGCGTGGGAGCAAACAG  
GATTAGATACCCTGGTAGTCCACGCCGTAAACGATGTGCACTTGGAGGTTGTTCCCTTGAGGAGTGGCTTCCG  
GAGCTAACGCGTTAAGTCGACCGCCTGGGGAGTACGGCCGCAAGGTTAAACTCAAATGAATTGACGGGG  
CCCGCACAAAGCGGTGGAGCATGTGGTTTAATTCGATGCAACGCGAAGAACCTTACCTACTCTTGACATCCAG  
AGAAGTTAGCAGAGATGGATTGGTGCCTTCGGGAACTCTGAGACAGGTGCTGCATGGCTGTCGTGAGCTCGT  
GTTGTGAAATGTTGGGTTAAGTCCCGCAACGAGCGCAACCCCTATCCTTTGTTGCCAGCGGTCCGGCCGGGA  
ACTCAAAGGAGACTGCCAGTGATAAACTGGAGGAAGGTGGGGATGACGTCAAGTCATCATGGCCCTTACGA  
GTAGGGCTACACACGTGCTACAATGGCGCATACAAAGAGAAGCGACCTCGCGAGAGCAAGCGGACCTCAT  
AAAGTGCGTCGTAGTCCGATTGGAGTCTGCAACTCGACTCCATGAAGTCGGAATCGCTAGTAATCGTAGAT  
CAGAATGCTACGGTGAATACGTTCCCGGGCCTTGTACACACCGCCCGTCA

LOCUS PP082614 1364 bp DNA linear BCT 04-JAN-2024

DEFINITION *Klebsiella oxytoca* strain 02-2 16S ribosomal RNA gene, partial  
sequence.

ACCESSION PP082614

VERSION PP082614

KEYWORDS .

SOURCE Klebsiella oxytoca

ORGANISM Klebsiella oxytoca

Bacteria; Pseudomonadota; Gammaproteobacteria; Enterobacterales;  
Enterobacteriaceae; Klebsiella/Raoultella group; Klebsiella.

REFERENCE 1 (bases 1 to 1364)

AUTHORS Hao,J., Zhang,X., Qiu,S., Song,F., Lyu,X., Ma,Y. and Peng,H.

TITLE Species Diversity, Nitrogen Fixation and Nutrient Solubilization  
Activities of Endophytic Bacteria in Pea Embryos

JOURNAL Unpublished

REFERENCE 2 (bases 1 to 1364)

AUTHORS Hao,J., Zhang,X., Qiu,S., Song,F., Lyu,X., Ma,Y. and Peng,H.

TITLE Direct Submission

JOURNAL Submitted (04-JAN-2024) Qingdao Academy of Agricultural Sciences,  
Qingdao Academy of Agricultural Sciences, Qingdao, Qingdao,  
Shandong 266100, China

COMMENT Sequences were screened for chimeras by the submitter using SeqMan7.1.

##Assembly-Data-START##

Sequencing Technology :: Sanger dideoxy sequencing

##Assembly-Data-END##

FEATURES Location/Qualifiers

source 1..1364

/organism="Klebsiella oxytoca"

/mol\_type="genomic DNA"

/strain="02-2"

/isolation\_source="Pea Embryos"

/db\_xref="taxon:571"

/clone="16s DNA"

/collection\_date="Oct-2023"

rRNA <1..>1364

/product="16S ribosomal RNA"

ORIGIN

1 agcttgctct cgggtgacga gtggcggacg ggtgagtaat gtctgggaaa ctgcccgatg  
61 gaggggggata actactggaa acggtagcta ataccgcata acgtcgcaag accaaagagg  
121 gggaccttcg ggctcttgc catcgatgt gccagatgg gattagcttg tagtgaggt  
181 aacggctcac ctaggcgacg atccctagct ggtctgagag gatgaccagc cacactggaa  
241 ctgagacacg gtccagactc ctacgggagg cagcagtggg gaatattgca caatgggcgc  
301 aagcctgatg cagccatgcc gcgtgtatga agaaggcctt cgggttgtaa agtactttca  
361 gcggggagga agggagttag gttaataacc ttattcattg acgttaccg cagaagaagc  
421 accggctaac tccgtccag cagccgggt aatacggagg gtgcaagcgt taatcggaat  
481 tactgggcgt aaagcgacg caggcggct gtcaagtcgg atgtgaaac cccgggctca  
541 acctgggaac tgcattcga actggcaggc tggagtctg tagagggggg tagaattcca  
601 ggtgtagcgg tgaatgcgt agagatctgg aggaataccg gtggcgaagg cggccccctg  
661 gacaaagact gacgtcagg tgcgaaagc tggggagcaa acaggattag ataccctggt  
721 agtccacgct gtaaacgatg tcgacttga ggttgtccc ttgaggagt gcttccggag  
781 ctaacgcgtt aagtcgaccg cctggggagt acggccgcaa ggttaaaact caaatgaatt  
841 gacgggggcc cgcacaagcg gtggagcatg tggtttaatt cgatgcaacg cgaagaacct  
901 tacctactct tgacatccag agaacttagc agagatgctt tggtccttc gggaactgtg  
961 agacagggtc tgcattgctg tcgtcagctc gtgttgtaa atgttgggtt aagtcccga  
1021 acgagcgcaa ccttatctt ttgtgccag cgattcgtc gggaactcaa aggagactgc  
1081 cagtataaa ctggaggaag gtgggatga cgtcaagtca tcatggccct tacgagtagg  
1141 gctacacacg tgctacaatg gcatatacaa agagaagcga cctcgcgaga gcaagcggac  
1201 ctataaaagt atgtcgtagt ccgattgga gtcgcaact cgactcatg aagtcggaat  
1261 cgctagtaat cgtggatcag aatgccacgg tgaatacgtt cccgggcctt gtacacaccg  
1321 cccgtcacac catgggagtg ggttgcaaaa gaagtaggta gctt

//

LOCUS PP082615 1430 bp DNA linear BCT 04-JAN-2024

DEFINITION *Enterobacter rogenkampii* strain 08-2 16S ribosomal RNA gene,  
partial sequence.

ACCESSION PP082615

VERSION PP082615



KEYWORDS .

SOURCE Enterobacter roggenkampii

ORGANISM Enterobacter roggenkampii

Bacteria; Pseudomonadota; Gammaproteobacteria; Enterobacterales;  
Enterobacteriaceae; Enterobacter; Enterobacter cloacae complex.

REFERENCE 1 (bases 1 to 1430)

AUTHORS Hao,J., Zhang,X., Qiu,S., Song,F., Lyu,X., Ma,Y. and Peng,H.

TITLE Species Diversity, Nitrogen Fixation and Nutrient Solubilization  
Activities of Endophytic Bacteria in Pea Embryos

JOURNAL Unpublished

REFERENCE 2 (bases 1 to 1430)

AUTHORS Hao,J., Zhang,X., Qiu,S., Song,F., Lyu,X., Ma,Y. and Peng,H.

TITLE Direct Submission

JOURNAL Submitted (04-JAN-2024) Qingdao Academy of Agricultural Sciences,  
Qingdao Academy of Agricultural Sciences, Qingdao, Qingdao,  
Shandong 266100, China

COMMENT Sequences were screened for chimeras by the submitter using SeqMan7.1.

##Assembly-Data-START##

Sequencing Technology :: Sanger dideoxy sequencing

##Assembly-Data-END##

FEATURES Location/Qualifiers

source 1..1430

/organism="Enterobacter roggenkampii"

/mol\_type="genomic DNA"

/strain="08-2"

/isolation\_source="Pea Embryos"

/db\_xref="taxon:1812935"

/clone="16s DNA"

/collection\_date="Oct-2023"

rRNA <1..>1430

/product="16S ribosomal RNA"

## ORIGIN

1 gggggggcct aacacatgca gtcgagcggg aacacaggga gcttgctccc ggggtgacgag  
61 cggcggacgg gtgagtaatg tctgggaaac tgcctgatgg agggggataa ctactggaaa  
121 cggtagctaa taccgcataa cgtcgcaaga ccaaagaggg ggaccttcgg gcctcttgcc  
181 atcagatgtg cccagatggg attagctagt aggtggggta acggctcacc taggcgacga  
241 tcctagctg gtctgagagg atgaccagcc acactggaac tgagacacgg tccagactcc  
301 tacgggaggg agcagtgggg aatattgcac aatgggcgca agcctgatgc agccatgccg  
361 cgtgtatgaa gaaggccttc ggggtgtaaa gtactttcag cggggaggaa ggtgttgagg  
421 ttaataacct catcaattga cgttaccgc agaaaaaca ccggctaact ccgtgccagc  
481 agccgcggta atacggaggg tgcaagcgtt aatcggaatt actgggcgta aagcgcacgc  
541 aggcggtctg tcaagtcgga tgtgaaatcc ccgggctcaa cctgggaact gcattcгаа  
601 ctggcaggct agagtcttgt agaggggggt agaattccag gtgtagcggg gaaatgcgta  
661 gagatctgga ggaataccgg tggcgaaggc ggccccctgg acaaagactg acgctcaggt  
721 gcгааagcgt ggggagcaaa caggattaga taccctggta gtccacgccg taaacgatgt  
781 cgacttgag gtgtgacct tgaggcgtgg cttccggagc taacgcgtta agtcgaccgc  
841 ctggggagta cggccgcaag gttaaaactc aatgaattg acggggggccc gcacaagcgg  
901 tggagcatgt ggtttaattc gatgcaacgc gaagaacctt acctacttt gacatccaga  
961 gaactttca gagatggatt ggtgccttcg ggaactctga gacaggtgct gcatggctgt  
1021 cgtcagctcg tgtgtgaaa tgttgggta agtcccгаа cgagcgcaac cttatcctt  
1081 tgttgccagc ggtccggccg ggaactcaaa ggagactgcc agtgataaac tggaggaagg  
1141 tggggatgac gtcaagtcat catggccctt acgagtaggg ctacacacgt gctacaatgg  
1201 cgcatacaaa gagaagcgac ctgcgagag caagcggacc tcataaagtg cgtcgtagtc  
1261 cggattggag tctgaaact gactccatga agtcggaatc gctagtaatc gtagtcaga  
1321 atgctacggt gaatacgttc ccgggccttg tacacaccgc ccgtcacacc atgggagtgg  
1381 gttgcaaaag aagtagtag cttaaccttc gggagggcgc ttaccacca

//

LOCUS PP082616 929 bp DNA linear BCT 04-JAN-2024

DEFINITION *Enterobacter soli* strain 08-3 16S ribosomal RNA gene, partial sequence.

ACCESSION PP082616

VERSION PP082616

KEYWORDS .

SOURCE Enterobacter soli

ORGANISM Enterobacter soli

Bacteria; Pseudomonadota; Gammaproteobacteria; Enterobacterales;  
Enterobacteriaceae; Enterobacter.

REFERENCE 1 (bases 1 to 929)

AUTHORS Hao,J., Zhang,X., Qiu,S., Song,F., Lyu,X., Ma,Y. and Peng,H.

TITLE Species Diversity, Nitrogen Fixation and Nutrient Solubilization  
Activities of Endophytic Bacteria in Pea Embryos

JOURNAL Unpublished

REFERENCE 2 (bases 1 to 929)

AUTHORS Hao,J., Zhang,X., Qiu,S., Song,F., Lyu,X., Ma,Y. and Peng,H.

TITLE Direct Submission

JOURNAL Submitted (04-JAN-2024) Qingdao Academy of Agricultural Sciences,  
Qingdao Academy of Agricultural Sciences, Qingdao, Qingdao,  
Shandong 266100, China

COMMENT Sequences were screened for chimeras by the submitter using SeqMan  
7.1.

##Assembly-Data-START##

Sequencing Technology :: Sanger dideoxy sequencing

##Assembly-Data-END##

FEATURES Location/Qualifiers

source 1..929

/organism="Enterobacter soli"

/mol\_type="genomic DNA"

/strain="08-3"

/isolation\_source="Pea Embryos"

/db\_xref="taxon:885040"

/clone="16s DNA"

/collection\_date="Oct-2023"

rRNA <1..>929

/product="16S ribosomal RNA"

ORIGIN

1 taccgcgaga agaagcacgc ggctaactcc ggtgccagca gccgcggtaa tacggagggt  
61 gcaagcgtta atcggaatta ctgggcgtaa agcgcacgca ggcggtctgt caagtcggat  
121 gtgaaatccc cgggctcaac tgggaactgc attcgaact ggcaaggctag agtctttag  
181 aggggggtag aattccaggt gtagcggta aatgcgtaga gatctggagg aataccggtg  
241 gcgaaggcgg cccctggac aaagactgac gctcagggtc gaaagcgtgg ggagcaaaca  
301 ggattagata ccctgtagt ccacgccgta aacgatgtcg acttggaggt tgttccttg  
361 aggagtggct tccggagcta acgcgttaag tcgaccgcct ggggagtacg gccgaaggt  
421 taaaactcaa atgaattgac gggggcccgc acaagcgggt gagcatgtgg ttaattcga  
481 tgcaacgcga agaacttac ctactctga catccagaga acttccaga gatggattgg  
541 tgccttcggg aactctgaga caggtgctgc atggctgtcg tcagctcgtg ttgtgaaatg  
601 ttgggttaag tccgcaacg agcgcaacc ttatccttg ttgccagcg ttaggcggg  
661 aactcaaagg agactgccag tgataactg gaggaagggt gggatgacgt caagtcac  
721 tggccttac gagtagggt acacacgtgc tacaatggca tatacaaaga gaagcgacct  
781 cgcgagagca agcggacct ataaagtatg tcgtagtccg gattggagtc tgcaactcga  
841 ctccatgaag tcggaatcgc tagtaatcgt agatcagaat gctacgggtga atacgtccc  
901 gggccttgta cacaccgcc gtcacacca

//

LOCUS PP082617 1333 bp DNA linear BCT 04-JAN-2024

DEFINITION *Enterobacter roggenkampii* strain 12-1 16S ribosomal RNA gene,  
partial sequence.

ACCESSION PP082617

VERSION PP082617

KEYWORDS .

SOURCE *Enterobacter roggenkampii*

ORGANISM *Enterobacter roggenkampii*

Bacteria; Pseudomonadota; Gammaproteobacteria; Enterobacterales;  
Enterobacteriaceae; *Enterobacter*; *Enterobacter cloacae* complex.

REFERENCE 1 (bases 1 to 1333)

AUTHORS Hao,J., Zhang,X., Qiu,S., Song,F., Lyu,X., Ma,Y. and Peng,H.

TITLE Species Diversity, Nitrogen Fixation and Nutrient Solubilization  
Activities of Endophytic Bacteria in Pea Embryos

JOURNAL Unpublished

REFERENCE 2 (bases 1 to 1333)

AUTHORS Hao,J., Zhang,X., Qiu,S., Song,F., Lyu,X., Ma,Y. and Peng,H.

TITLE Direct Submission

JOURNAL Submitted (04-JAN-2024) Qingdao Academy of Agricultural Sciences,  
Qingdao Academy of Agricultural Sciences, Qingdao, Qingdao,  
Shandong 266100, China

COMMENT Sequences were screened for chimeras by the submitter using SeqMan 7.1.

##Assembly-Data-START##

Sequencing Technology :: Sanger dideoxy sequencing

##Assembly-Data-END##

FEATURES Location/Qualifiers

source 1..1333  
/organism="Enterobacter roggenkampii"  
/mol\_type="genomic DNA"  
/strain="12-2"  
/isolation\_source="Pea Embryos"  
/db\_xref="taxon:1812935"  
/clone="16s DNA"  
/collection\_date="Oct-2023"  
  
rRNA <1..>1333  
/product="16S ribosomal RNA"

ORIGIN

1 cacagggagc ttgctcctgg gtgacgagcg gcggacgggt gagtaatgtc tgggaaactg  
61 cctgatggag ggggataact actggaaacg gtagctaata ccgcataacg tcgcaagacc  
121 aaagaggggg accttcgggc ctcttgccat cagatgtgcc cagatgggat tagctagtag  
181 gtggggtaac ggctcaccta ggcgacgac cctagctggt ctgagaggat gaccagccac  
241 actggaactg agacacggtc cagactccta cgggaggcag cagtggggaa tattgcacaa  
301 tgggcgcaag cctgatgcag ccatgccgcg tgtatgaaga aggccttcgg gttgtaaagt

361 actttcagcg gggaggaagg tgtgaggtt aataacctca gcaattgacg ttacccgag  
421 aagaagcacc ggctaactcc gtgccagcag ccgcggtaat acggagggtg caagcgtaa  
481 tcggaattac tgggcgtaaa gcgcacgcag gcggtctgtc aagtcggatg tgaatcccc  
541 gggctcaacc tgggaactgc attcgaaact ggcaggctag agtctttag aggggggtag  
601 aattccaggt gtagcgtga aatgcgtaga gatctggagg aataccggtg gcgaaggcgg  
661 cccctggac aaagactgac gtcagggtgc gaaagcgtgg gagcaaacag gattagatac  
721 cctgtagtc cagccgtaa acgatgtcga ctggagggtt gttccctga ggagtggctt  
781 ccggagctaa cgcgttaagt cgaccgcctg gggagtacgg ccgaagggtt aaaactcaa  
841 tgaattgacg ggggcccga caagcgtgg agcatgtgtt ttaattgat gcaacgcga  
901 gaaccttacc tactcttgac atccagagaa ctagcagag atggattggt gccttcggga  
961 actctgagac aggtgctgca tggctgtcgt cagctcgtgt tgtgaaatgt tgggttaagt  
1021 cccgcaacga gcgaacctt tacccttgt tgccagcggc ccggccggga actcaaagga  
1081 gactgccagt gataaactgg aggaagggtg ggaatgacgtc aagtcacat ggcccttacg  
1141 agtagggcta cacacgtgct acaatggcgc atacaaagag aagcgacctc gcgagagcaa  
1201 gcggacctca taaagtgcgt cgtagtccgg attggagtct gcaactcgac tccatgaagt  
1261 cggaatcgct agtaatcgta gatcagaatg ctacggtgaa tacgttcccg ggccttgat  
1321 acaccgcccg tca

//
